# Supplementary material for: Ionic liquids and plastic crystals with a symmetrical pyrrolidinium cation
Source: Royal Society of Chemistry journal article supplement (doi:10.1039/c8qm00016f), 2018-01-01
Supplement: c8qm00016f1.pdf [file c8qm00016f1.pdf]

## Supporting information.

### Ionic liquids and plastic crystals with a symmetrical pyrrolidinium cation

Ruhamah Yunis,<sup>a</sup> Timothy W. Newbegin,<sup>a</sup> Anthony F. Hollenkamp<sup>b</sup> and Jennifer M. Pringle<sup>a</sup>

<sup>a</sup> Deakin University, Melbourne, Institute for Frontier Materials, Victoria 3125, Australia. Email: [jenny.pringle@deakin.edu.au](mailto:jenny.pringle@deakin.edu.au)

<sup>b</sup> Commonwealth Scientific and Industrial Research Organisation (CSIRO), Energy Flagship, Clayton, 3168, VIC, Australia

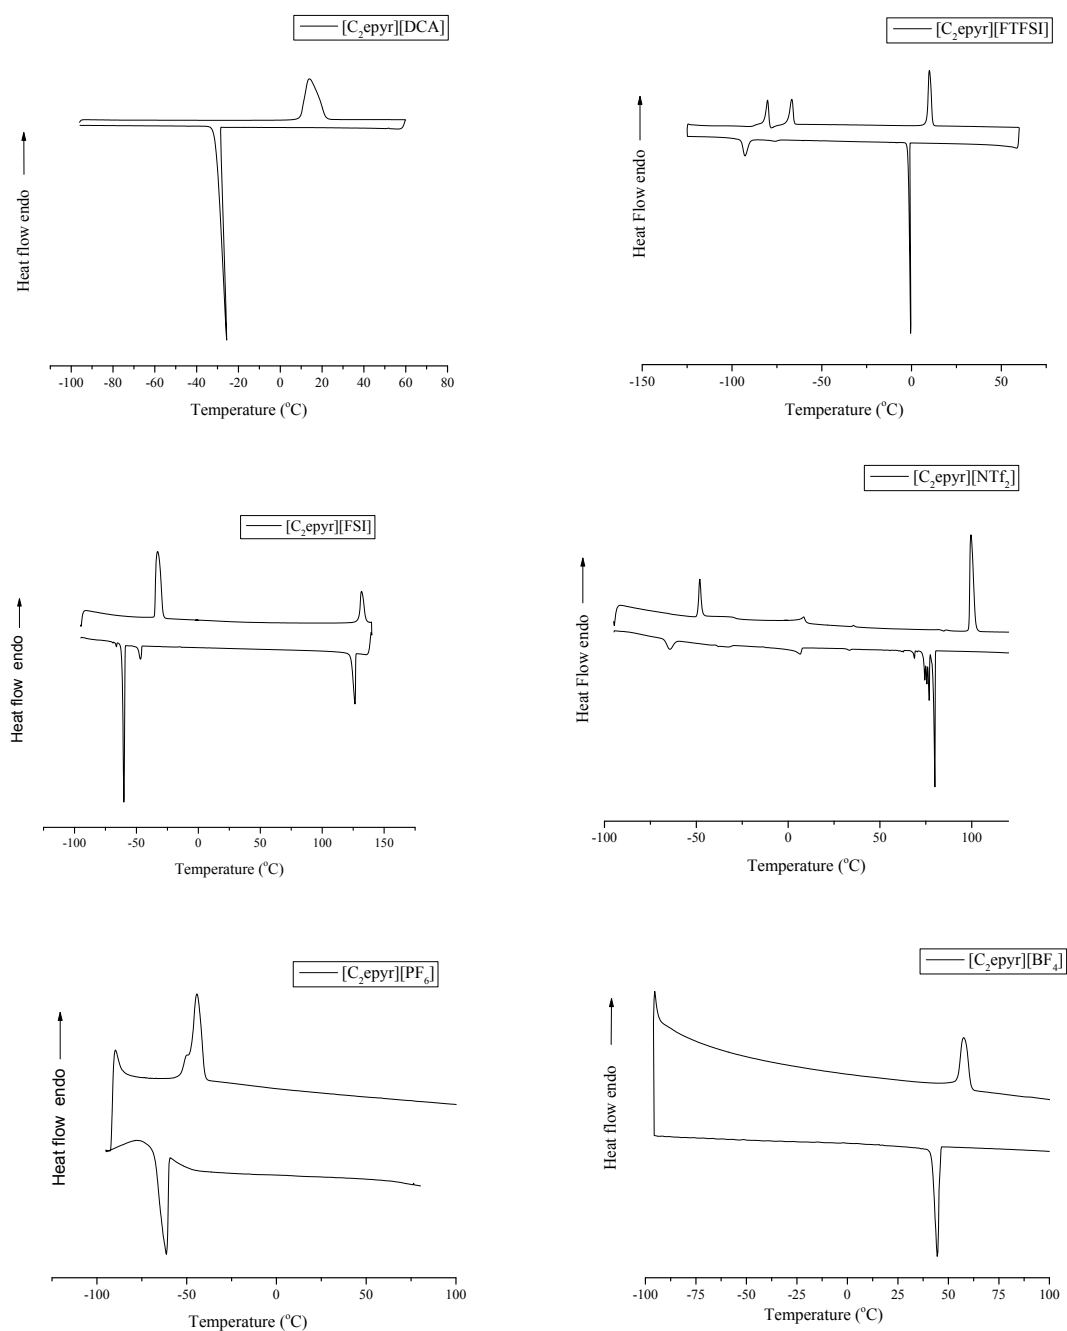

Figure S1. DSC heating and cooling traces for the ILs and OIPCs.
